# Supplementary material for: The Impact of Autoimmune Hepatitis and Its Treatment on Health Utility
Source: PubMed Central journal article supplement — Hepatology. 2018 Oct 5;68(4):1487–97. doi: 10.1002/hep.30031 (PMC6585808; doi:10.1002/hep.30031), 2018-10-05

[Supplementary Table Legend](#)

**Supplementary Table 1: Therapy regimens**

[Supplementary Figure Legend](#)

**Supplementary Figure 1:** Comparison of EQ-5D-5L response levels, split by health domain between AIH and PBC

**Supplementary Table 1: Therapy regimens**

| Therapy                                                 | n   | %     | Median dose (range)<br>(mg) |
|---------------------------------------------------------|-----|-------|-----------------------------|
| Prednisolone monotherapy                                | 90  | 9.1%  | 7.3 (0.5-50)                |
| Prednisolone combination                                | 409 | 41.3% | 5.0 (0.2-60)                |
| Budesonide monotherapy                                  | 13  | 1.3%  | 6 (1.5-9.0)                 |
| Budesonide combination                                  | 34  | 3.4%  | 3 (0.4-9.0)                 |
| Azathioprine monotherapy                                | 299 | 30.2% | 100 (25-250)                |
| Dose/weight (mg/kg)                                     |     |       | 1.1 (0.2-2.6)               |
| Azathioprine combination                                | 282 | 28.5% | 100 (25-250)                |
| Dose/weight (mg/kg)                                     |     |       | 1.2 (0.2-2.8)               |
| 6-Mercaptopurine monotherapy                            | 22  | 2.2%  | 50 (25-100)                 |
| 6-Mercaptopurine combination                            | 26  | 2.6%  | 50 (12-150)                 |
| Mycophenolate mofetil/<br>mycophenolic acid monotherapy | 50  | 5.1%  | 1000 (500 – 3000)           |
| Mycophenolate mofetil/<br>mycophenolic acid combination | 116 | 11.7% | 1000 (200 – 3000)           |
| Tacrolimus monotherapy                                  | 3   | 0.3%  | 1.5 (1.0-2.0)               |
| Tacrolimus combination                                  | 38  | 3.8%  | 2 (0.5-9.0)                 |
| Cyclosporine monotherapy                                | 1   | 0.1%  | 75 (NA)                     |
| Cyclosporine combination                                | 5   | 0.5%  | 150 (50-300)                |

## AIH

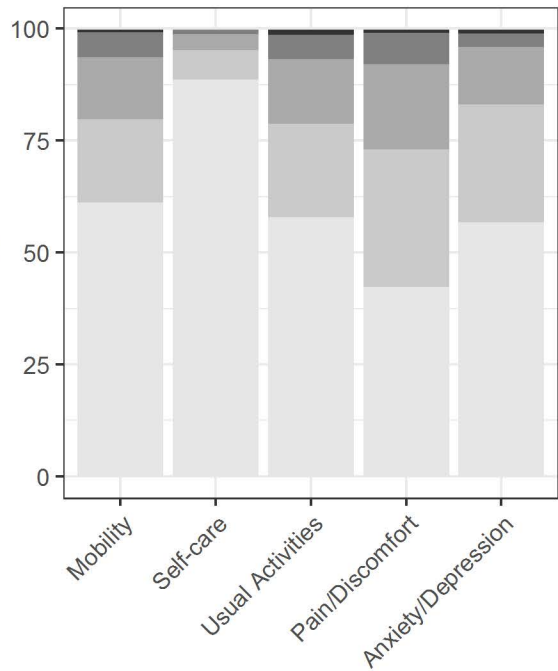

## PBC

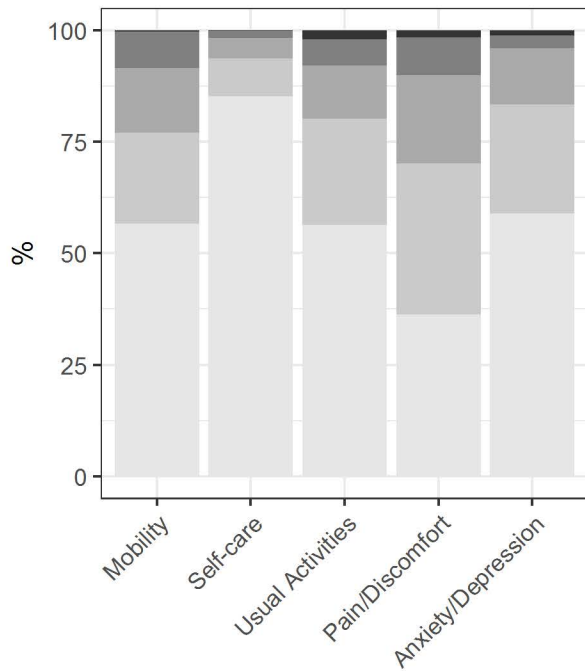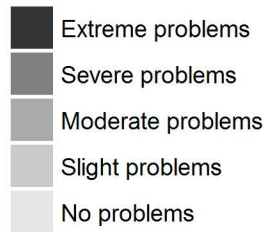

Supplement: HEP-68-1487-s001.pdf [file HEP-68-1487-s001.pdf]
